# Supplementary material for: The Potential Impact of Job Automation on Veterans in Vocational Rehabilitation Programs
Source: Atypon-hosted journal article supplement (doi:10.1176/appi.ps.202000172), 2020-08-19
Supplement: appi.ps.202000172.ds001.pdf [file appi.ps.202000172.ds001.pdf]

Online Supplement. Qualitative responses of CWT managers about the potential impact on veterans of job automation (N=62)<sup>a</sup>

| <b>Theme</b>             | <b>Sample Responses</b>                                                                                                                                                                                                                      | <b># of responses</b> |
|--------------------------|----------------------------------------------------------------------------------------------------------------------------------------------------------------------------------------------------------------------------------------------|-----------------------|
| No concern/little impact | <p>“So far we have not had any problems in this area.”</p> <p>“We are not overly concerned at this point. There are many more jobs in [state] than there are people to fill them.”</p>                                                       | 23                    |
| Vaguely negative         | <p>“I believe it will not be beneficial.”</p> <p>“Limits job opportunity for veterans.”</p> <p>“Automation has decreased jobs available to vets and all workers.”</p>                                                                        | 13                    |
| Specifically negative    | <p>“Retail services and industrial jobs will become more automated and result in less jobs.”</p> <p>“This trend towards service automation puts in vulnerability and impacts the ability to effectively employ the veterans we serve...”</p> | 12                    |
| New jobs will emerge     | <p>“Somebody has to maintain the robots.”</p> <p>“We will need someone to repair them.”</p> <p>“[Job automation] offer different employment opportunities.”</p> <p>“We can learn to run the machines.”</p>                                   | 9                     |
| Neutral/missing          | “Not sure”                                                                                                                                                                                                                                   | 5                     |

<sup>a</sup> Managers were asked: “What thoughts, if any, do you have about the impact of job automation (i.e., robots/machines replacing human jobs) on the veterans you serve?”
